# Supplementary material
Source: PubMed Central journal article supplement (PMC4810467)
Supplement: MCB.00594-15_zmb999101160so1.pdf [file MCB.00594-15_zmb999101160so1.pdf]

## Supplementary material

### Figure Legends

**Figure S1: Phostag gel analysis reveals ECD is phosphorylated on six residues.** (A) *in vitro* phosphorylated WT ECD, 6S/A mutant, or WT phosphatase treated samples were analyzed on phostag PAGE or normal SDS PAGE. (B) FLAG-tagged ECD and the mutant 3'S/A were transfected into T98G cells, subjected to IP, followed by western blotting with anti-p-Ser or anti-FLAG antibodies.

**Figure S2: DS<sub>p</sub>DD/E motifs of ECD are dispensable for cell cycle function.** (A) Cell cycle rescue experiment was performed by transfecting WT type or indicated phospho mutants of ECD into Ecd<sup>fl/fl</sup> MEFs, followed by removal of endogenous Ecd using Cre adenovirus. Graph indicates Cre/Ctrl ratio of cell numbers at different time intervals. The outcome Cre/Ctrl ratio was calculated per sample at each time point (mean ± standard deviations). Each time point indicates the average cell number of biological triplicates. (B) Shown are Δ499-527 (Lacking two DS<sub>p</sub>DD motifs) expression levels at different time points after Cre adenovirus infection. Note that reconstituted cells express both mouse (m; upper band) Ecd and human (lower band) Δ499-527 ECD mutant.

**Figure S3: Phospho-defective mutants retain the ability to interact with PIH1D1 and other components of R2TP complex in cells.** (A) HEK293T cells were transfected with GFP tagged vector, WT, 3S/A or 6S/A. Cell lysates were subjected to immunoprecipitation with PIH1D1 antibody and complex was eluted with 2x sample lysis buffer followed by western blotting with indicated antibodies. (B & C) Phosphatase treatment did not disrupt the interaction between ECD and PIH1D1. HEK293T cells were transfected with WT ECD, lysates were collected in lysis buffer without phosphatase inhibitor and then subjected to phosphatase treatment and subsequent immunoprecipitation and western blotting with indicated antibodies. (D) Mimicking of phosphoserines into aspartic acid did not mimic binding to PIH1D1. *In vitro* interaction of GST-PIH1D1 with ECD and its phospho mutants. GST-PIH1D1 was immobilized on GST beads and incubated with HEK-293T cells lysate expressing FLAG-WT, 3S/A, 3'S/A, 6S/A and 6S/D proteins. (E) Interaction between ECD and PRP8 was confirmed by coimmunoprecipitation..

**Figure S4: RUVBL1 interacts with only full length ECD.** (A) Schematic representation of various GFP-tagged C-terminal deletion constructs of ECD. (B) HEK293T cells were transfected with indicated GFP tagged constructs. Cell lysates were subjected to immunoprecipitation with RUVBL1 antibody, the complex was eluted with 2x sample lysis buffer followed by western blotting with indicated antibodies. Arrow indicates the size of protein of interest. (C) Endogenous RUVBL1 interacts with GST-ECD. Indicated GST-tagged ECD proteins were immobilized on GST beads and incubated with 293T cell lysate, followed by GST pull down washed and western blotting with RUVBL1 antibody. (D) Interaction of R2TP complex components with GST-PIH1D1 from the lysates expressing deletion mutants of ECD. (E)

Expression of various pMSCV- Flag-tagged constructs of ECD. (F) Phosphodeficient mutants retain the ability to interact with retinoblastoma (RB) protein. HEK293T cells were transfected with FLAG tagged vector, WT, 3S/A or 6S/A, immunoprecipitated with anti-RB antibody followed by western blotting with indicated antibodies.

**Figure S5: Full blots of various Figures. Boxed region shows the cropped region used in the main manuscript. Subnumbering refer to the no in main Figures.**

**Fig.S1**

**A.**

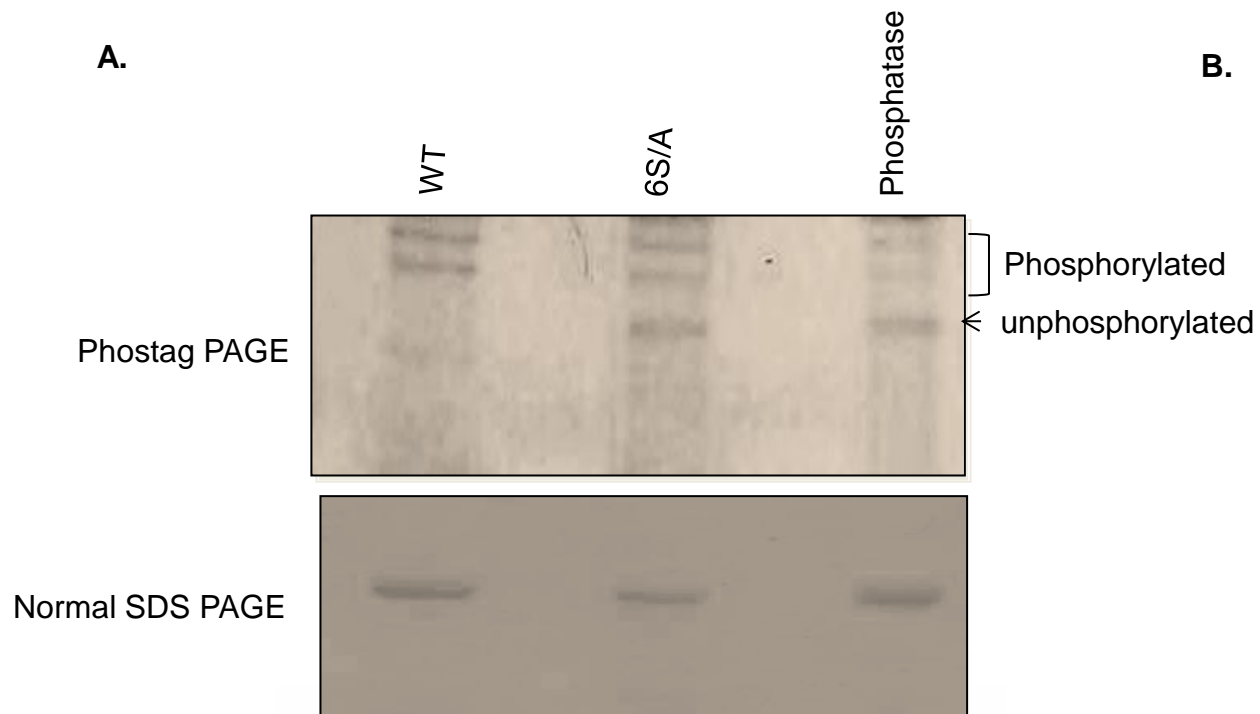

**B.**

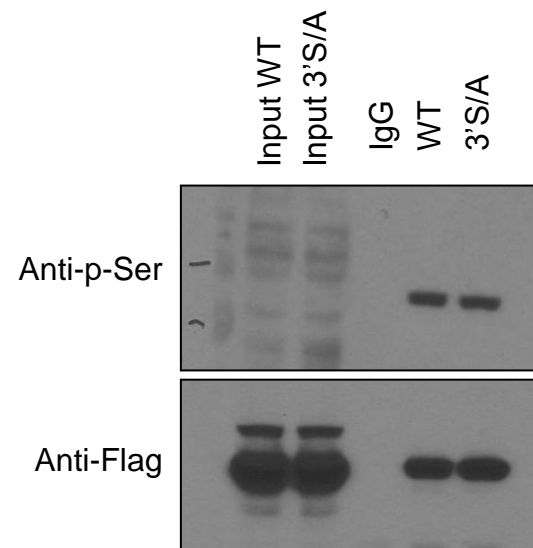

Figure S2

A.

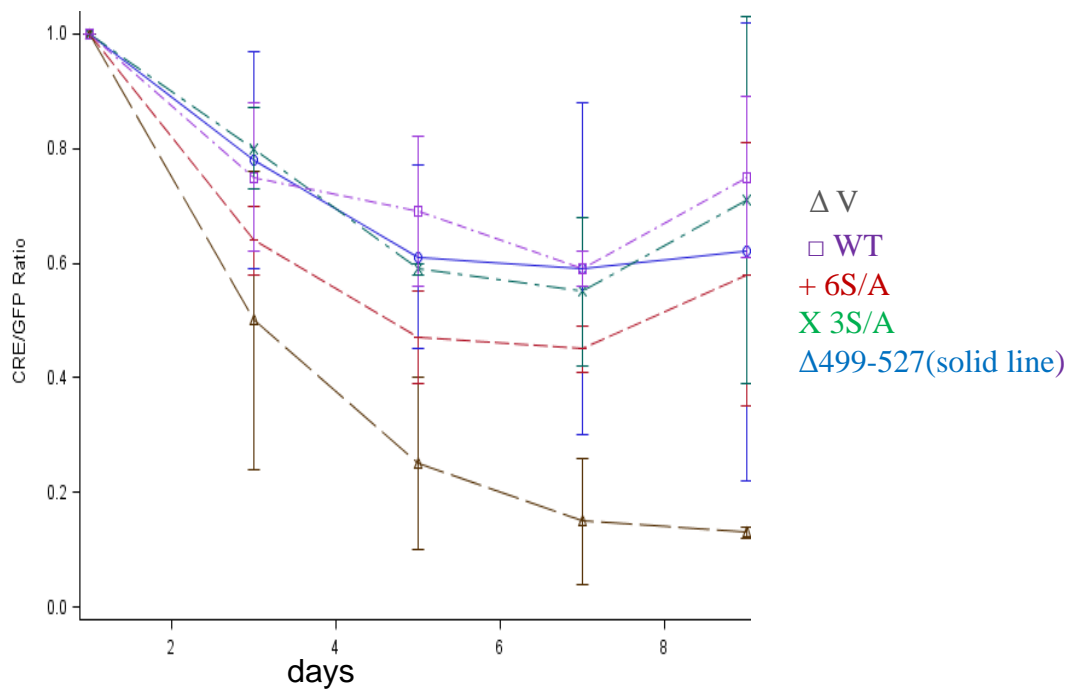

B.

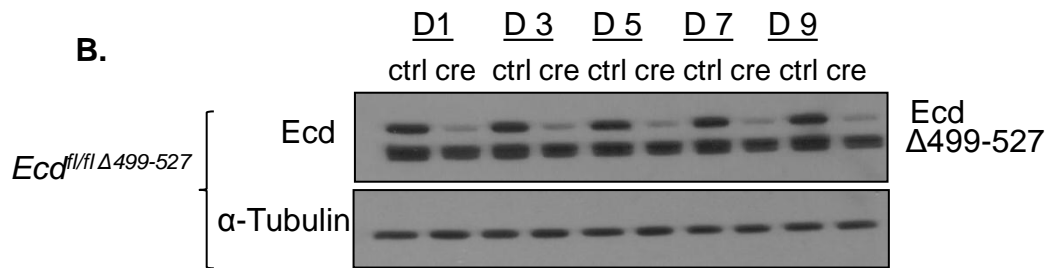

**Figure S3**

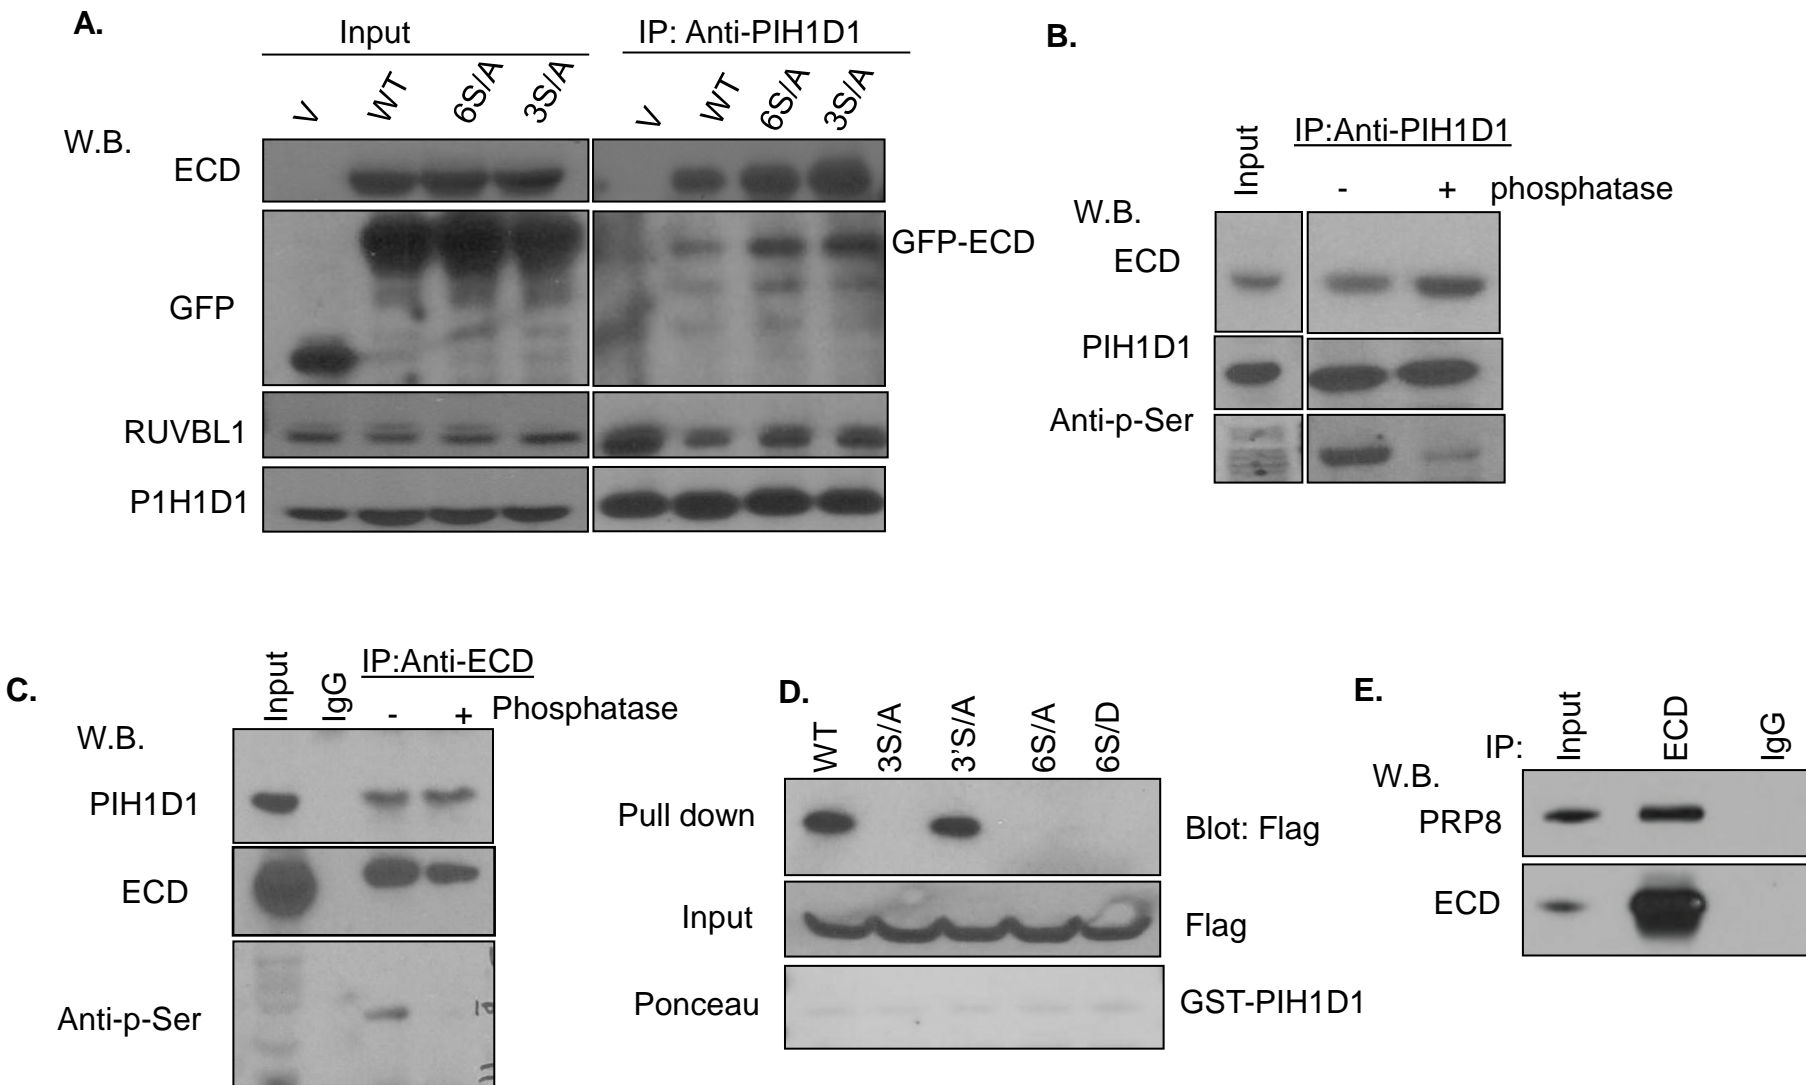

**Figure S4**

**A.**

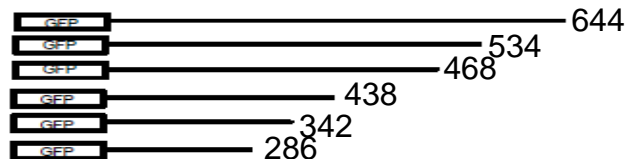

**B.**

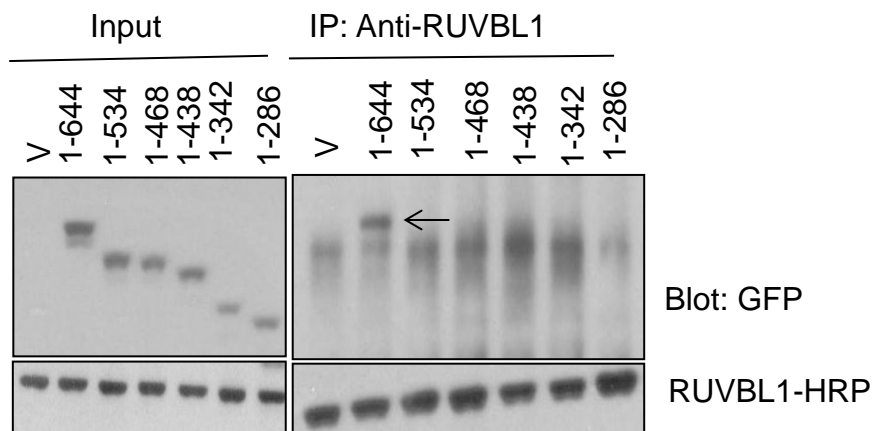

**C.**

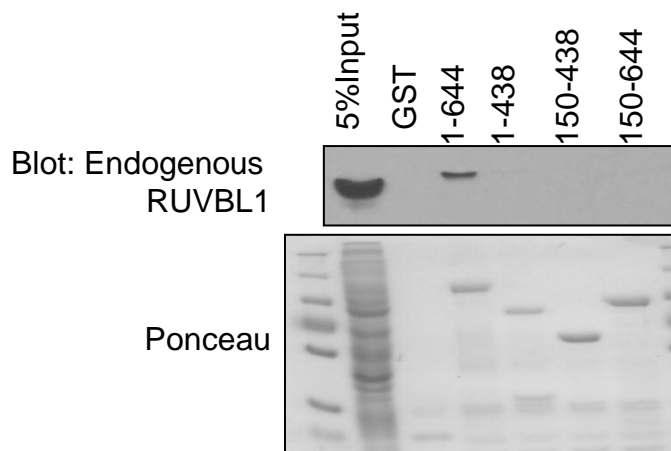

**D.**

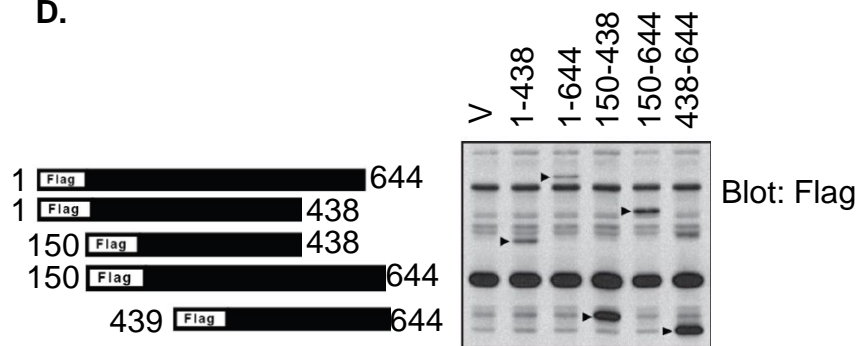

**E.**

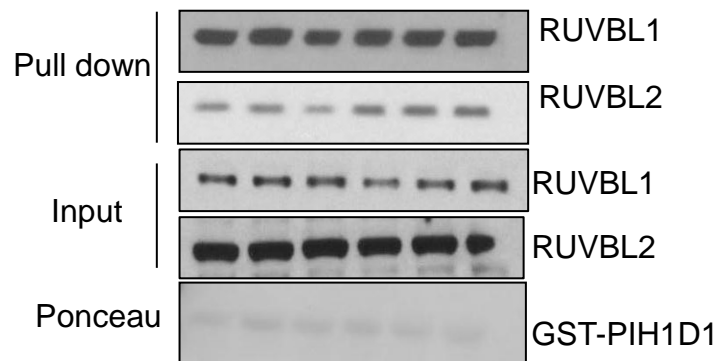

**F.**

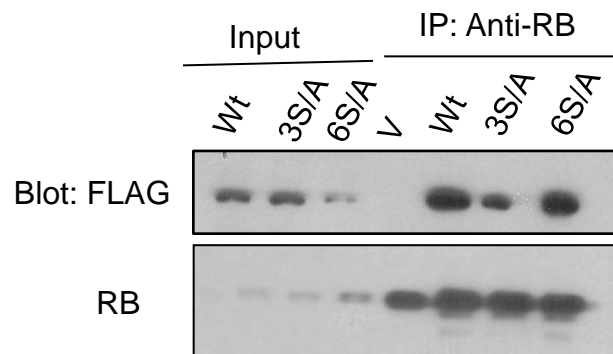

**Figure S5**

Fig 1B

ECD

$\beta$ -actin

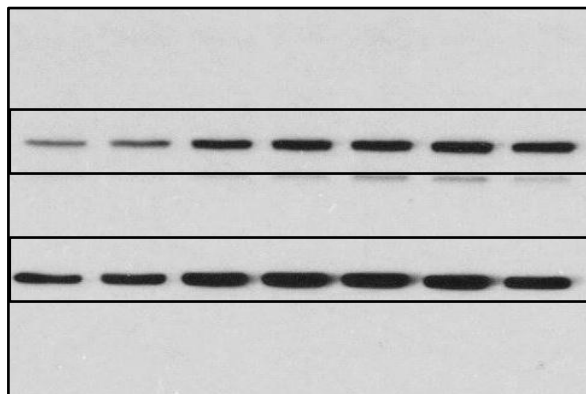

Fig 1C

PARP

ECD H.E

GAPDH

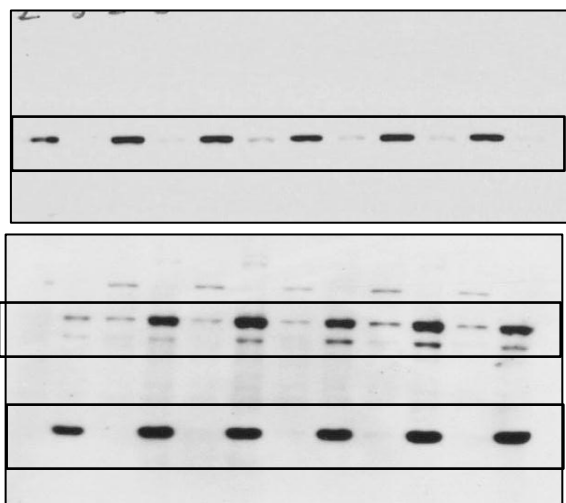

ECD LE

GAPDH

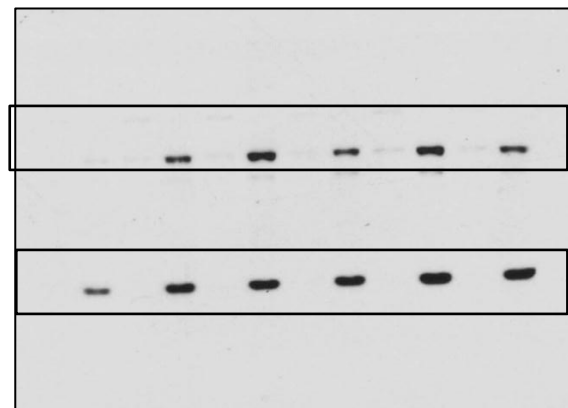

Fig 2C

p-Ser

Heavy Chain

p-Thr

ECD

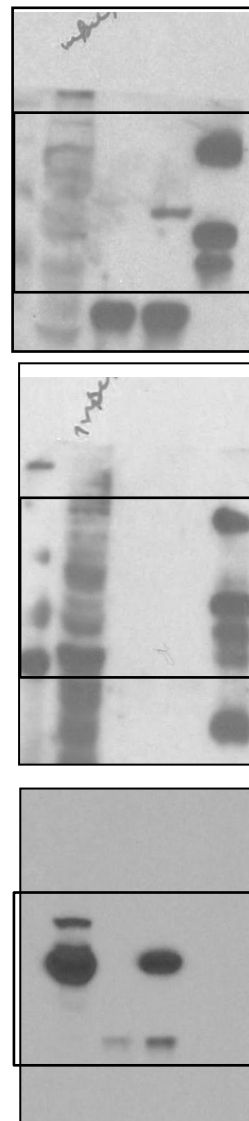

Figure S5 continue

Fig 3B.

Autorad.

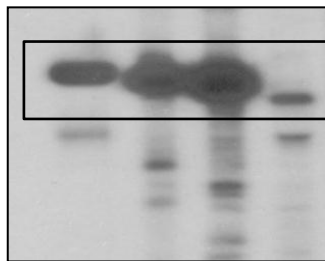

Fig 3F.

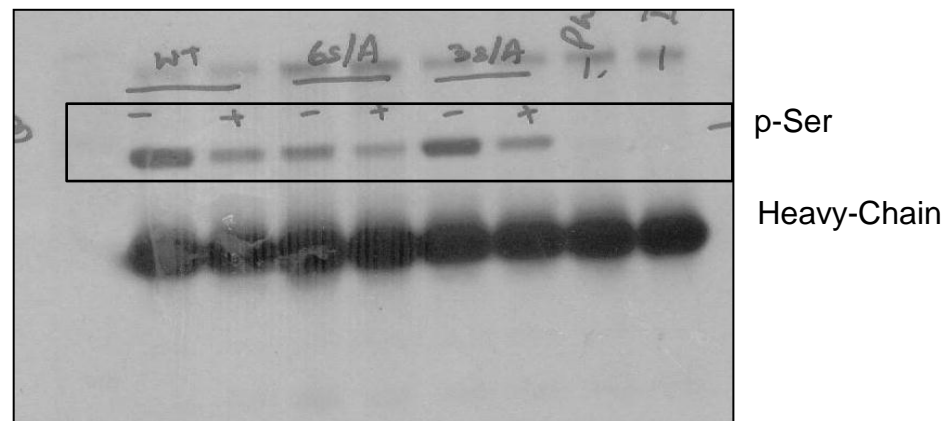

Fig 3D.

Autorad.

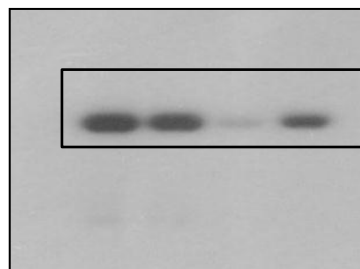

p-Ser

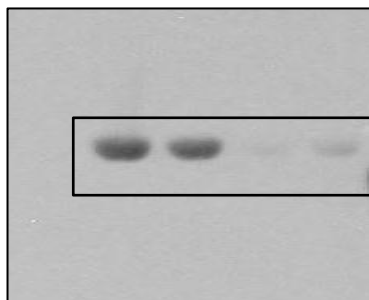

ECD

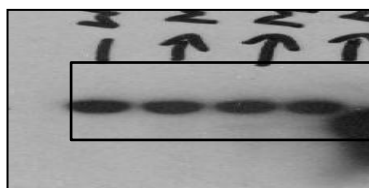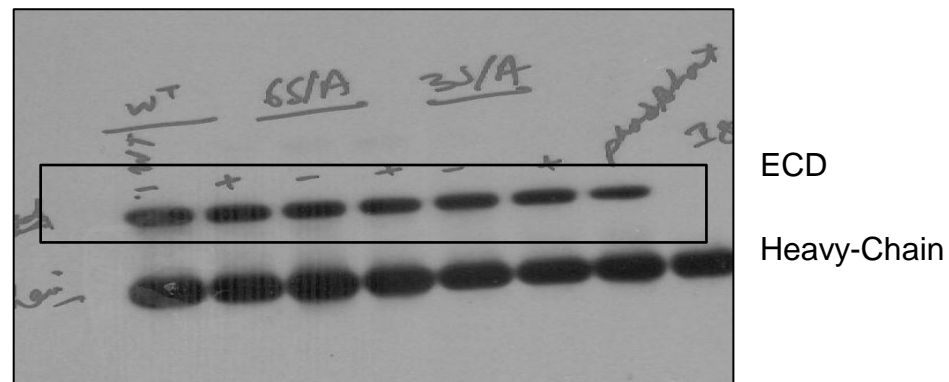



**Figure S5 continue**

Fig.4B

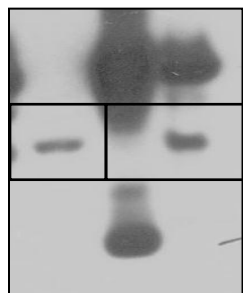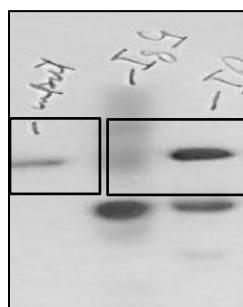

Fig.4C

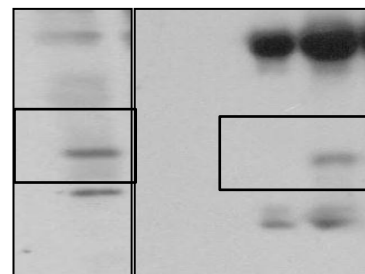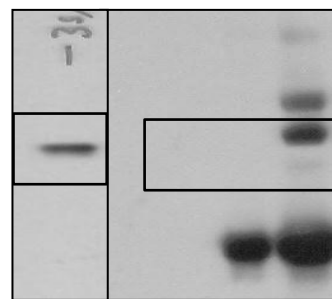

Fig.4D

Heavy Chain

pih1d1

Light Chain

Ecd

Heavy Chain

IP

ECD

Heavy Chain

PIH1D1

RPAP3

RUVBL1

RUVBL2

Fig.5B

Blot: Flag

RUVBL1-HRP

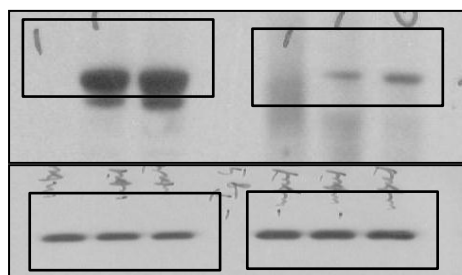

Fig.5C  
RUVBL1-HRP

PIH1D1

ECD

Light Chain

heavy Chain

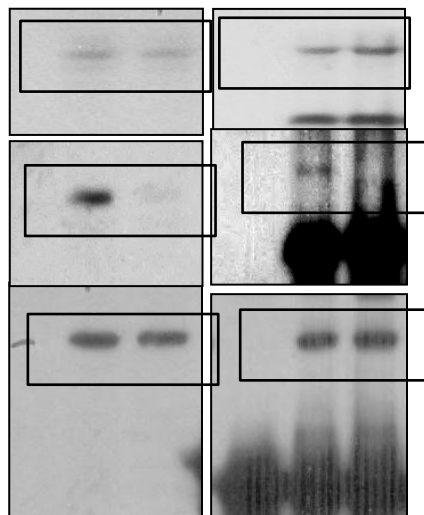

**Table S1. Cre/Ctrl ratio and ‘p’ Values for all groups of cells**

| Day | cell type | N | Mean | Std Dev | overall p-value | p-value of other type vs. Wt comparison with simulation's correction |
|-----|-----------|---|------|---------|-----------------|----------------------------------------------------------------------|
| 1   | 6S/A      | 9 | 1    | 0       | 0.99            | 0.99                                                                 |
|     | 3S/A      | 9 | 1    | 0       |                 | 0.99                                                                 |
|     | V         | 9 | 1    | 0       |                 | 0.99                                                                 |
|     | WT        | 9 | 1    | 0       |                 | --                                                                   |
| 3   | 6S/A      | 9 | 0.68 | 0.04    | <.0001          | <.0001                                                               |
|     | 3S/A      | 9 | 0.77 | 0.08    |                 | 0.29                                                                 |
|     | V         | 9 | 0.64 | 0.14    |                 | 0.0007                                                               |
|     | WT        | 9 | 0.83 | 0.07    |                 | --                                                                   |
| 5   | 6S/A      | 9 | 0.51 | 0.04    | <.0001          | <.0001                                                               |
|     | 3S/A      | 9 | 0.71 | 0.08    |                 | 0.98                                                                 |
|     | V         | 9 | 0.25 | 0.06    |                 | <.0001                                                               |
|     | WT        | 9 | 0.72 | 0.05    |                 | --                                                                   |
| 7   | 6S/A      | 9 | 0.49 | 0.04    | <.0001          | <.0001                                                               |
|     | 3S/A      | 9 | 0.65 | 0.08    |                 | 0.05                                                                 |
|     | V         | 9 | 0.12 | 0.05    |                 | <.0001                                                               |
|     | WT        | 9 | 0.75 | 0.1     |                 | --                                                                   |
| 9   | 6S/A      | 9 | 0.5  | 0.1     | <.0001          | <.0001                                                               |
|     | 3S/A      | 9 | 0.62 | 0.12    |                 | 0.11                                                                 |
|     | V         | 9 | 0.09 | 0.03    |                 | <.0001                                                               |
|     | WT        | 9 | 0.71 | 0.06    |                 | --                                                                   |

**Table S1** .Table lists statistically significant differences among the four groups in Cre/Ctrl ratio at day 3, 5, 7 or 9 (all p values are <0.0001). Further analysis with Simulation's correction to control for multiple testing revealed that the mean ratio of WT group was significantly higher than that of V group and 6S/A group at day 3, 5, 7, and 9 (p<0.001 ); and there was no evidence of a difference in Cre/Ctrlratio between WT group and 3S/A group at day 1, 3, 5, and 9, and at day 7 there was a marginally significant difference between WT group and 3S/A group (p=0.05).

| Name of construct                                                                                                                                 | Primers for Cloning                                                                           | Forward                                                                                                                                                                                                                                 | Reverse                                                                                                                                                                                                                                                                                                                                                                                                                                                             |
|---------------------------------------------------------------------------------------------------------------------------------------------------|-----------------------------------------------------------------------------------------------|-----------------------------------------------------------------------------------------------------------------------------------------------------------------------------------------------------------------------------------------|---------------------------------------------------------------------------------------------------------------------------------------------------------------------------------------------------------------------------------------------------------------------------------------------------------------------------------------------------------------------------------------------------------------------------------------------------------------------|
| pMSCVpuro ECD Δ499-527                                                                                                                            | Primers for cloning of Δ499-527 by three fragment ligation.                                   | <b>Ecd BglII I 5'</b> /CGCCGGAATTAGATCTATGG<br>AAGAAACCATGAA-3'                                                                                                                                                                         | <b>Ecd HpaIR15'</b> -CCGGTAGAATTCGTAAACGTC<br>GACTGGCCCTAAAATC-3'                                                                                                                                                                                                                                                                                                                                                                                                   |
| pMSCVpuro ECD                                                                                                                                     | Primers used for cloning of ECD in to pMSCV puro vector.                                      | <b>Ecd Sall F 5'</b> /TTAGGGCCAGTCGACCCT<br>GGCGAAGAGGCT -3'                                                                                                                                                                            | <b>Ecd HpaI R 5'</b> - CCGGTAGAATTCGTAACT<br>TAATTTTTTGTGG-3'                                                                                                                                                                                                                                                                                                                                                                                                       |
| ECD pXLG Nterm TCM his Strep Dest<br>1-534 pXLG Nterm TCM<br>1-468pXLGNterm TCM<br>1-432pXLGNterm TCM<br>1-342pXLGNterm TCM<br>1-286pXLGNterm TCM | Primers used for cloning of ECD in ST6GAL1-XLG-NtermTCMhisStrep-DEST                          | <b>ECD F EcoRI 5'</b> -CACCCACGGCGAATTCATG<br>GAAGAAACCATGAAG 3'                                                                                                                                                                        | <b>ECD HindIII R5'</b> - GATTGGATCCAAGCTT<br>TTAATTTTTTGTGGCTT-3'<br><b>HindIII 534 R 5'</b> -<br>GATTGGATCCAAGCTTTCA<br>CCCTAAAATCTTATCAAAT3'<br><b>HindIII 468R 5'</b> -<br>GATTGGATCCAAGCTTTTCATCC<br>CTTGTGGGTGAGACTT-3'<br><b>HindIII 432R 5'</b> -<br>GATTGGATCCAAGCTTTTCAGCCA<br>ACAGCTTCCTGCAGCA-3'<br><b>Hind III 342R 5'</b> -<br>GATTGGATCCAAGCTTTCAATTC<br>TTTTTCAGACTTTCA-3'<br><b>HindIII 286R-5'</b> -<br>GATTGGATCCAAGCTTTTCACAGC<br>CTGTATCCACT-3' |
| PIH1D1pGEX6p1                                                                                                                                     | Primers for subcloning of PIH1D1 in to pGEX-6p-1                                              | <b>PIH1BglII F 5'</b> /GGGAGATCTATGGCGA<br>ACCCGAAGCTGC-3'                                                                                                                                                                              | <b>PIH1XhoI R 5'</b> / GGGCTCGAGTCAAGAA<br>GGCACCGGCAG-3'                                                                                                                                                                                                                                                                                                                                                                                                           |
| ECDpET28B+                                                                                                                                        | Primers for cloning of ECD in to Pet28b+                                                      | <b>ECD F XbaI 5'</b> /TCTAGAAATAATTTTGT<br>AACTTTAAGAAGGAGATATACCAATGGAAG<br>AAACCATGAAGC-3'                                                                                                                                            | <b>ECD R XhoI 5'</b> /CTCGAGTTAGTGGTGGT<br>GGTGGTGGTATTTTTTGTGGCTT-3'<br><b>R XhoI 534-5'</b> -CTCGAGTTAGTGGTGGT<br>GGTGGTGGTCTCGAG<br>TTAGTGGTGGTGGTGGT-3'<br><b>R xhoI 432 -5'</b> /CTCGAGTTAGTGGTGGT<br>GTGGTGGTGCCAA<br>CAGCTTCCTGCAGCA-3'                                                                                                                                                                                                                      |
| 1-534pET28B+                                                                                                                                      |                                                                                               |                                                                                                                                                                                                                                         |                                                                                                                                                                                                                                                                                                                                                                                                                                                                     |
| 1-432pET28B+                                                                                                                                      |                                                                                               |                                                                                                                                                                                                                                         |                                                                                                                                                                                                                                                                                                                                                                                                                                                                     |
| pMSCV3S/A,6S/A                                                                                                                                    | Primers used for site directed mutagenesis 3S/A & 6S/A .<br>(for 6S/A 3S/A was used template) | <b>ECD S503,505,518F 5'</b> /CCAAGGCCTAATG<br>AGGCAGATGCTGATGATCTGGATGATGAAGA<br>CTTTGAATGTTAGATGCTGAT<br>GATGACTTGGGA-3'<br><b>ECDS572,579,584AF 5'</b> /CAAGTGGAACTGT<br>AGCCAGACTACCGATAACAATGCAGATGAGGA<br>AGATGCTGGTACGGGAGAAT -3' | <b>ECD503,505,518R 5'</b> /TCCAAGTCATCATCAG<br>CATCTAAACATTCAAAGT CTCATCATCC<br>AGATCATCAGCATCT<br>GCCTCATTAGGCCTTGG-3'<br><b>ECDS572, 579,584R 5'</b> /<br>ATTCTCCCGTACCAGCA<br>TCTTCCTCATCTGCATTG<br>TTATCGGTAGTCTGGGCTA<br>CAGGTT CCACTT-3'<br><b>NotI 5'</b> -<br>ACCGCGCCGCTCACTTCATGTACTT<br>ATCTGCT-3'                                                                                                                                                       |
| pMSCV 3'S/A                                                                                                                                       |                                                                                               |                                                                                                                                                                                                                                         |                                                                                                                                                                                                                                                                                                                                                                                                                                                                     |
| Flag - RUVBL1pCDNA3.1                                                                                                                             | Primers for cloning of RUVBL1 in to pCDNA3.1                                                  | <b>BamHI F 5'</b> -AAGTCGACAAGGATCCATGAAG<br>ATTGAGGAGGTGAAGAG-3'                                                                                                                                                                       |                                                                                                                                                                                                                                                                                                                                                                                                                                                                     |

Table S2: Primer Sequences Used for Cloning of Various Constructs
